# Supplementary material for: MT2A is an early predictive biomarker of response to chemotherapy and a potential therapeutic target in osteosarcoma
Source: PubMed Central journal article supplement (PMC6707240; doi:10.1038/s41598-019-48846-2), 2019-08-23
Supplement: 41598_2019_48846_MOESM1_ESM.pdf [file 41598_2019_48846_MOESM1_ESM.pdf]

## *Supplementary materials*

### **MT2A is an early predictive biomarker of response to chemotherapy and a potential therapeutic target in osteosarcoma**

**Adèle Mangelinck<sup>1,2,3</sup>, Maria Eugénia Marques da Costa<sup>4,5,6</sup>, Bojana Stefanovska<sup>1,5</sup>, Olivia Bawa<sup>7</sup>, Mélanie Polrot<sup>7</sup>, Nathalie Gaspar<sup>4,8</sup>, and Olivia Fromigüé<sup>1,5,\*</sup>**

<sup>1</sup> INSERM, UMR981, Gustave Roussy, Villejuif, F-94805, France

<sup>2</sup> Ecole Nationale Supérieure de Chimie de Montpellier (ENSCM), Montpellier, F-34090, France

<sup>3</sup> Université de Montpellier, Montpellier, F-34090, France

<sup>4</sup> CNRS, UMR8203, Gustave Roussy, Villejuif, F-94805, France

<sup>5</sup> Université Paris Sud, Université Paris Saclay, Orsay, F-91400, France

<sup>6</sup> CESAM, Department of Biology, University of Aveiro, Aveiro, P-3810, Portugal

<sup>7</sup> Plateforme d'évaluation préclinique (PFEP), Gustave Roussy, Villejuif, F-94805, France

<sup>8</sup> Département de cancérologie de l'enfant et de l'adolescent, Gustave Roussy, Villejuif, F-94805, France

\* Corresponding author: [olivia.fromigue@inserm.fr](mailto:olivia.fromigue@inserm.fr)

**Supplemental Table 1:** Primer sequences used for qPCR on human (h) and murine (m) samples.

| <b>Name</b> | <b>GeneBank No</b> | <b>Primer sequence (5' – 3')</b>                             |
|-------------|--------------------|--------------------------------------------------------------|
| hGAPDH      | NM_002046          | Forward AGCCACATCGCTCAGACAC<br>Reverse GCCCAATACGACCAAATCC   |
| hMT2A       | NM_005953          | Forward TGCACCTCCTGCAAGAAA<br>Reverse CAGCAGCTGCACTTGTCC     |
| mGAPDH      | NM_008084          | Forward ACACATTGGGGGTAGGAACA<br>Reverse AACTTTGGCATTGTGGAAGG |
| mMT2        | NM_008630          | Forward CATGGACCCCAACTGCTC<br>Reverse AGCAGGAGCAGCAGCTTT     |

**Supplemental Table 2. Half maximal inhibitory concentrations (IC50) for chemotherapy.** Cell viability was assessed by the MTS test in the indicated human osteosarcoma cell lines incubated for 72 hrs in the presence of increasing doses of each indicated drug.

| <b>Cell Line</b> | <b>CISP<br/>(<math>\mu</math>M)</b> | <b>DOXO<br/>(<math>\mu</math>M)</b> | <b>ETOP<br/>(<math>\mu</math>M)</b> | <b>IFOS<br/>(<math>\mu</math>M)</b> | <b>MTX<br/>(<math>\mu</math>M)</b> |
|------------------|-------------------------------------|-------------------------------------|-------------------------------------|-------------------------------------|------------------------------------|
| 143B             | 2.04                                | 0.046                               | 0.670                               | 12.34                               | 0.040                              |
| CAL72            | 14.27                               | 0.201                               | 2.836                               | 27.42                               | 0.298                              |
| HOS              | 3.17                                | 0.049                               | 0.638                               | 9.814                               | 0.019                              |
| IOR/OS18         | 31.54                               | 0.159                               | 4.21                                | 30.32                               | 0.327                              |
| MG63             | 2.23                                | 0.140                               | 3.41                                | 11.12                               | 0.327                              |
| OHS4             | 10.813                              | 0.098                               | 2.751                               | 2.431                               | 0.006                              |
| SaOS2            | 3.87                                | 0.062                               | 2.27                                | 17.94                               | 0.059                              |
| U2OS             | 9.40                                | 0.155                               | 2.28                                | 23.05                               | 0.029                              |

## SUPPLEMENTAL FIGURE 1

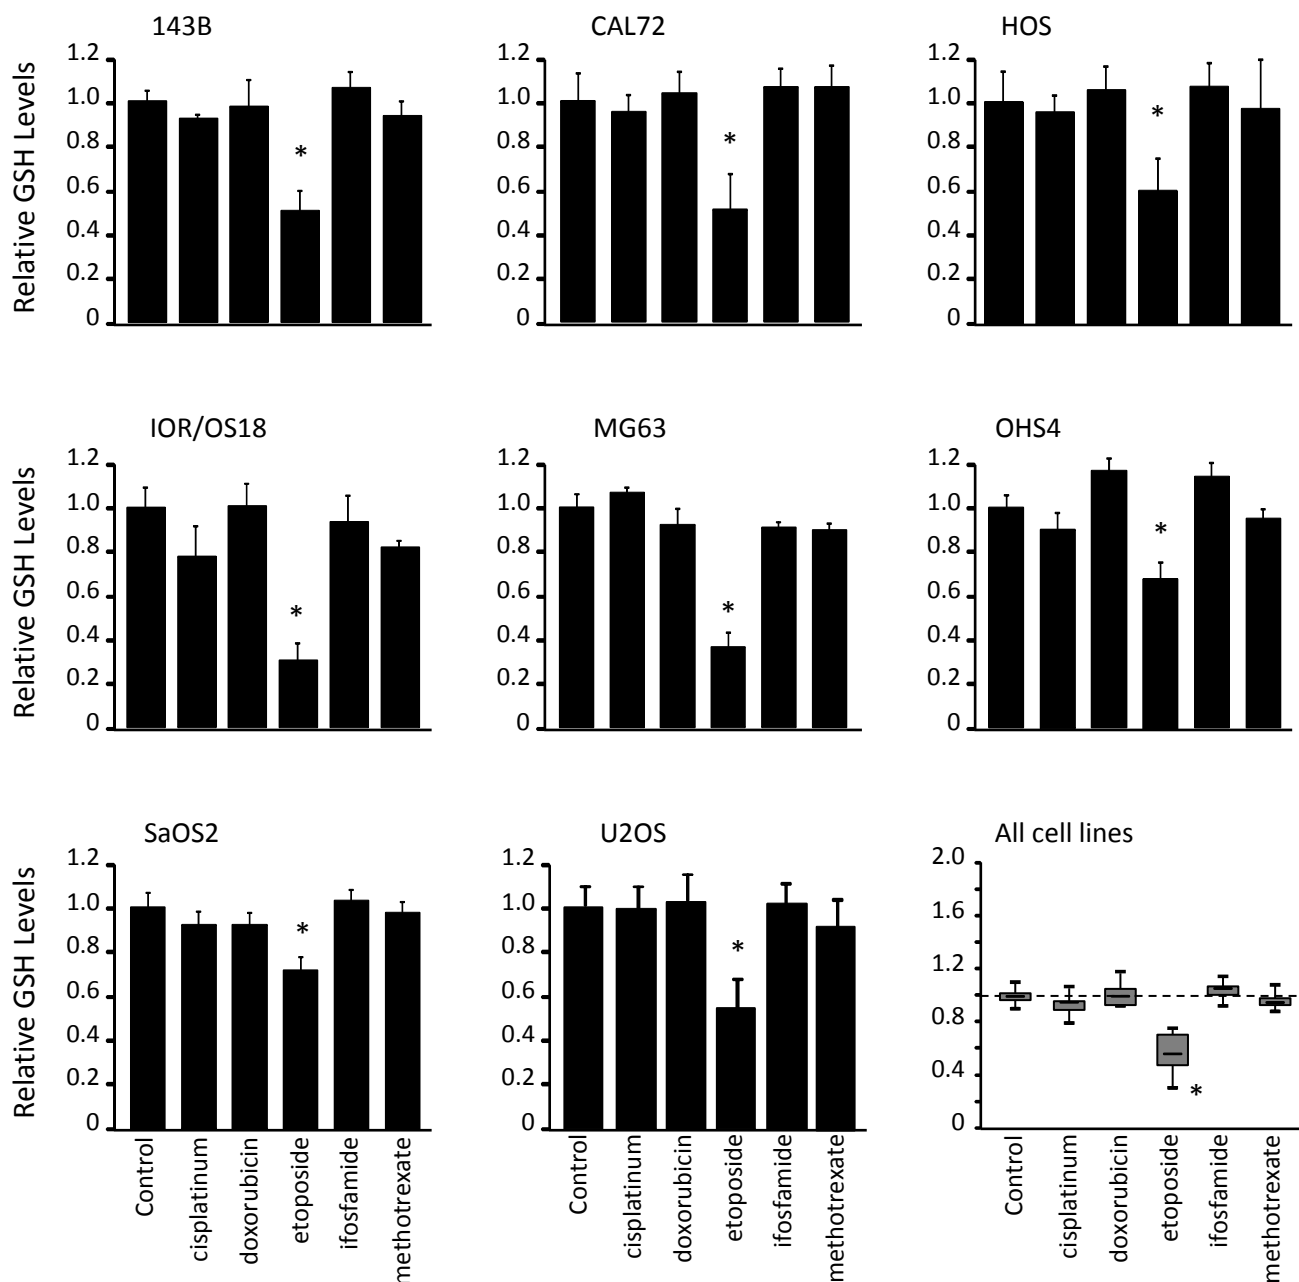

### Supplemental Figure 1: Assessment of glutathione as alternative detoxification pathway.

Relative glutathione (GSH) level in 143B, CAL72, HOS, IOR/OS18, MG63, OHS4, SaOS2, and U2OS cells incubated in the presence of the chemotherapeutic drugs (100  $\mu$ M cisplatin; 1.84  $\mu$ M doxorubicin; 10  $\mu$ M etoposide; 5 mM ifosfamide or 5 mM methotrexate) or solvent, as assessed by a colorimetric assay. Results are expressed as fold change value normalized to untreated cells (mean  $\pm$  standard deviation; n = 6). An asterisk (\*) indicates a statistically significant difference (p < 0.05). Box plot of distribution of relative GSH level in all cell lines incubated for 24 hrs in the presence of indicated drugs.

## SUPPLEMENTAL FIGURE 2

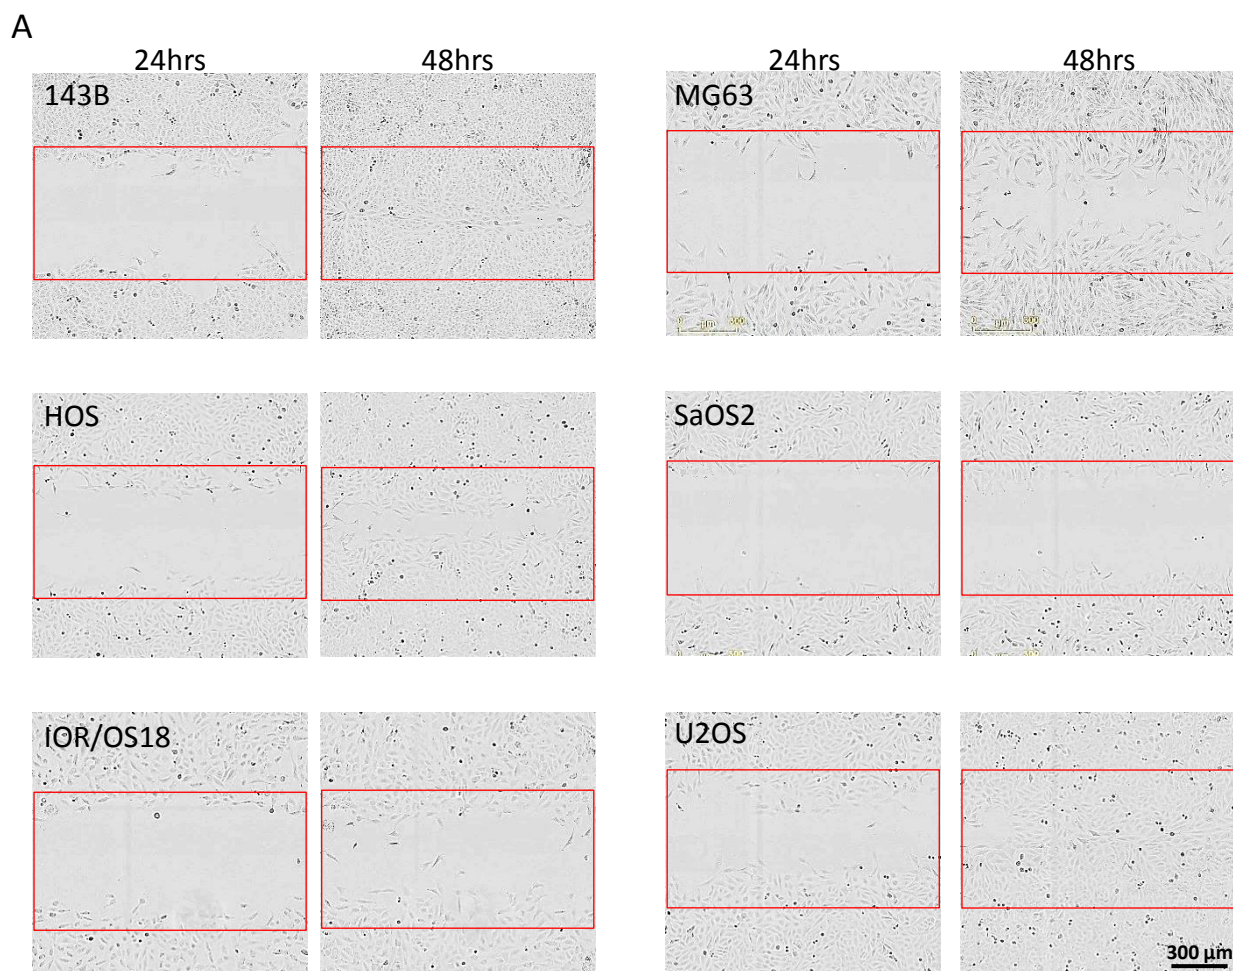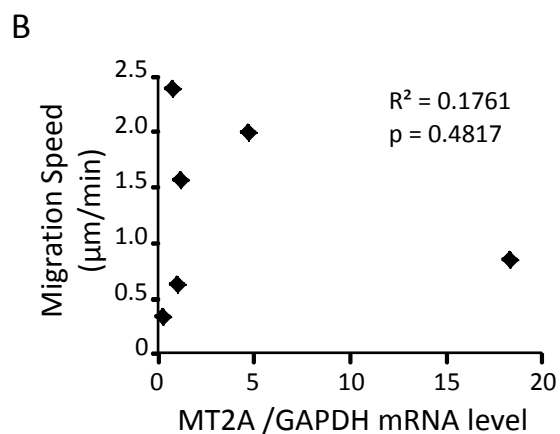

### Supplemental Figure 2: MT2A level does not modulate cell migration. (A)

Representative photographs of indicated cells migrating into scratch wound area at 24, and 48 hrs after scratch. Red lines indicate initial scratch wound area. (B)

Spearman correlation between migration speed, and MT2A mRNA level in the indicated cell lines. The determination coefficient  $R^2$  and the significance of the F test (P-value) are also given.

SUPPLEMENTAL FIGURE 3

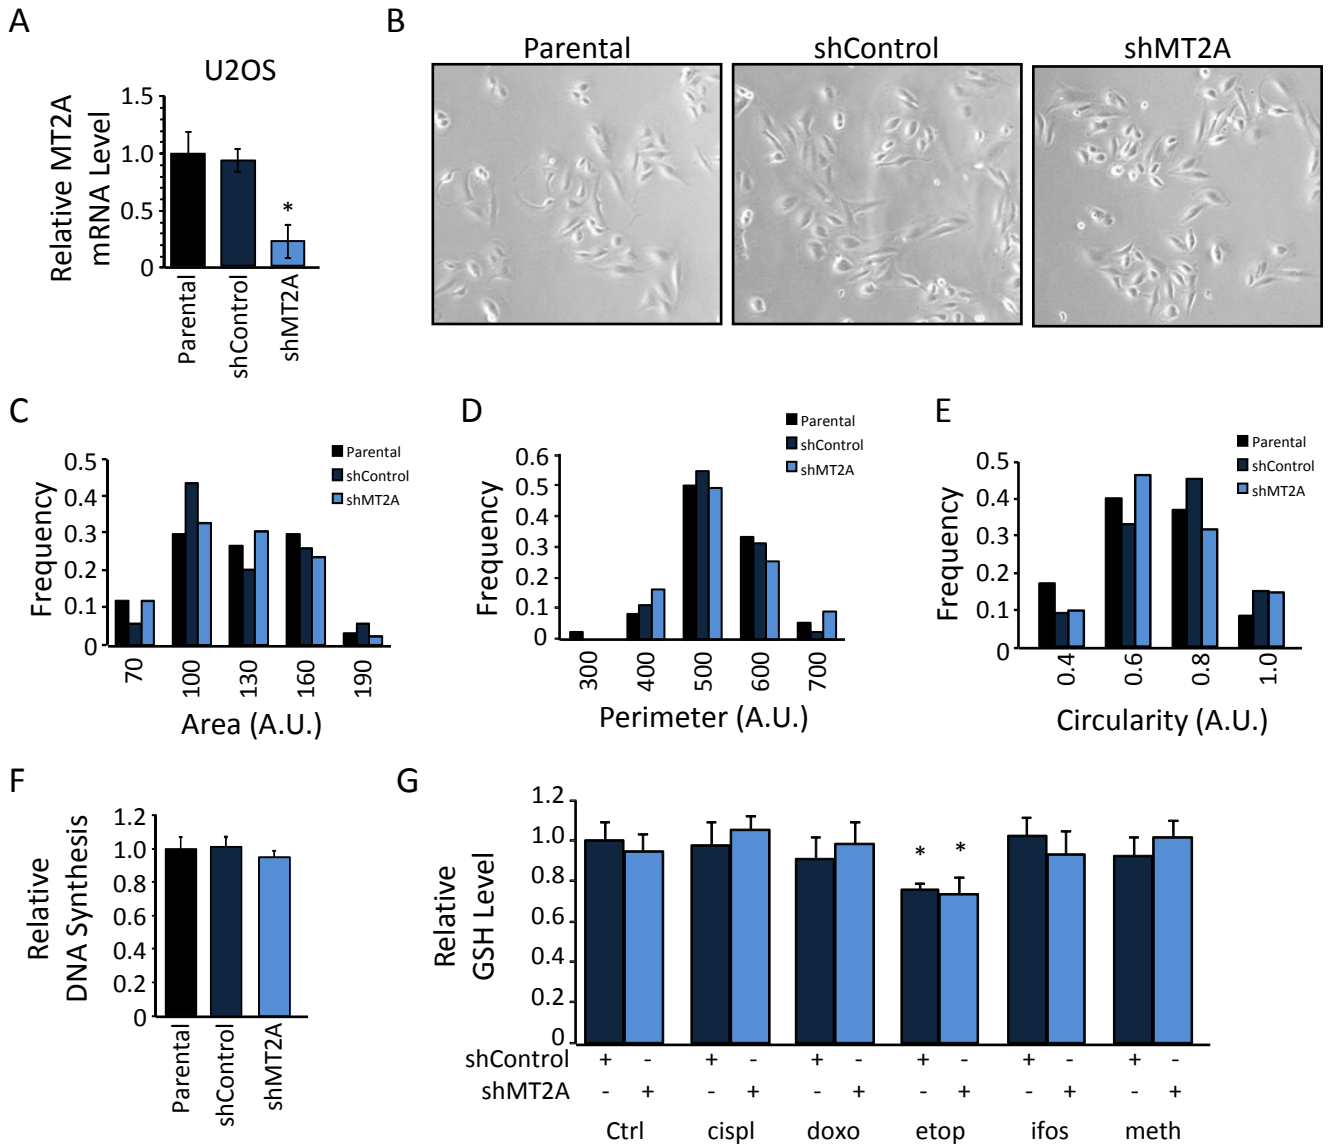

**Supplemental Figure 3: Characterization of MT2A-silenced U2OS cell line.** (A) Expression levels of MT2A in parental and stably modified U2OS cells, as assessed by RT-qPCR. GAPDH was used as internal reference gene. The relative mRNA level was calculated using the  $2^{-\Delta\Delta CT}$  method and expressed as mean  $\pm$  standard deviation ( $n = 3$ ). An asterisk (\*) indicates a statistically significant difference ( $p < 0.05$  vs. control). (B) Representative images in parental and stably modified cells (200X magnification). (C-E) Distribution of cell shape parameters as function of the frequency of occurrence. (F) Relative DNA synthesis, as assessed by a BrdU incorporation assay. Results are expressed as fold change value normalized to parental cells (mean  $\pm$  standard deviation;  $n = 8$ ). (G) Relative glutathione (GSH) level in shControl- or shMT2A-modified U2OS cells incubated in the presence of the indicated drugs, as assessed by a colorimetric assay. Results are expressed as fold change value normalized to untreated cells (mean  $\pm$  standard deviation;  $n = 4$ ).

SUPPLEMENTAL FIGURE 4

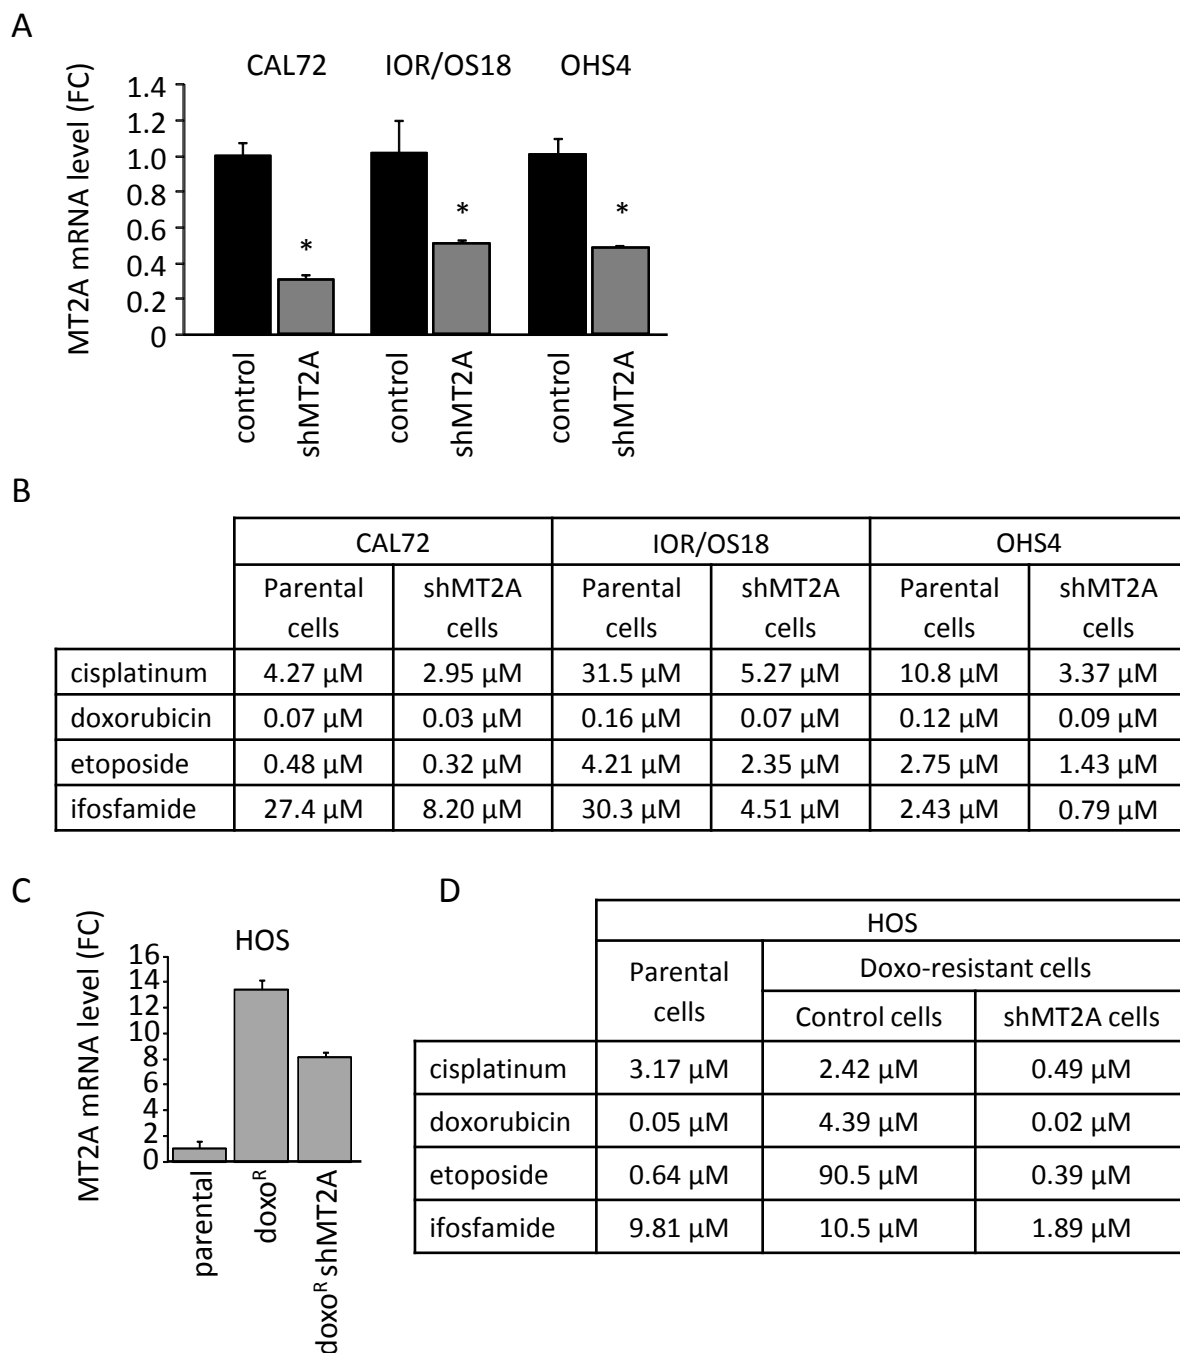

**Supplemental Figure 4: Characterization of MT2A-silenced human cell lines.** (A) Expression levels of MT2A in parental and stably modified U2OS cells, as assessed by RT-qPCR. GAPDH was used as internal reference gene. The relative mRNA level was calculated using the  $2^{-\Delta\Delta CT}$  method and expressed as mean  $\pm$  standard deviation (n = 3). An asterisk (\*) indicates a statistically significant difference ( $p < 0.05$  vs. control). (B,D) Half maximal inhibitory concentration (IC50) values determined after 72 hrs incubation in the presence of the indicated drugs.



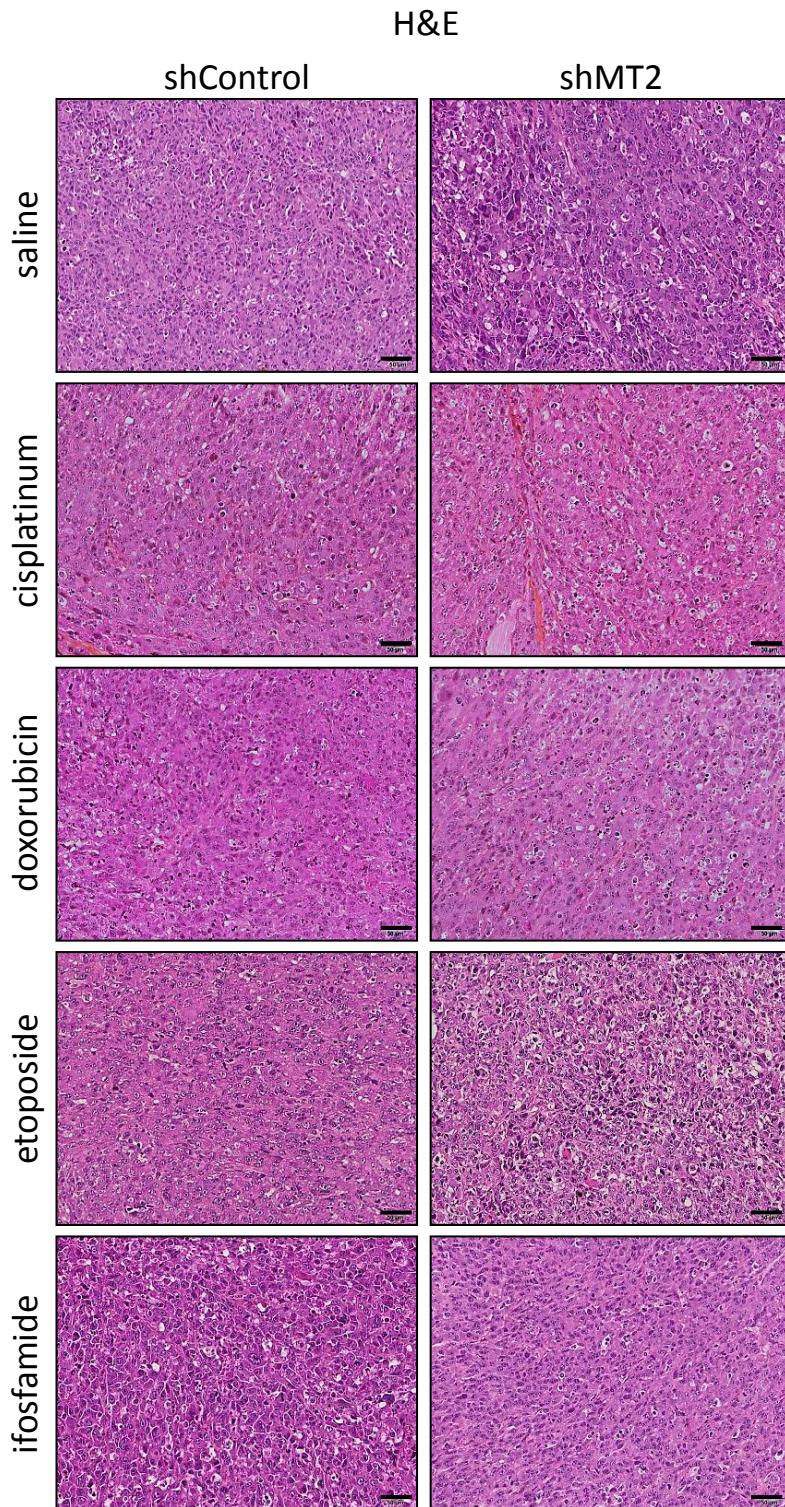

**Supplemental Figure 5.** K7M2 cells modified with shControl or shMT2 were injected IM into the thighs of SCID mice and administered with chemotherapy as described in the materials & methods section. Representative image showing Hematoxylin and Eosin (H&E) staining in K7M2 shControl- or shMT2-derived primary tumours. The scale bars represent 50  $\mu$ m.



SUPPLEMENTAL FIGURE 6

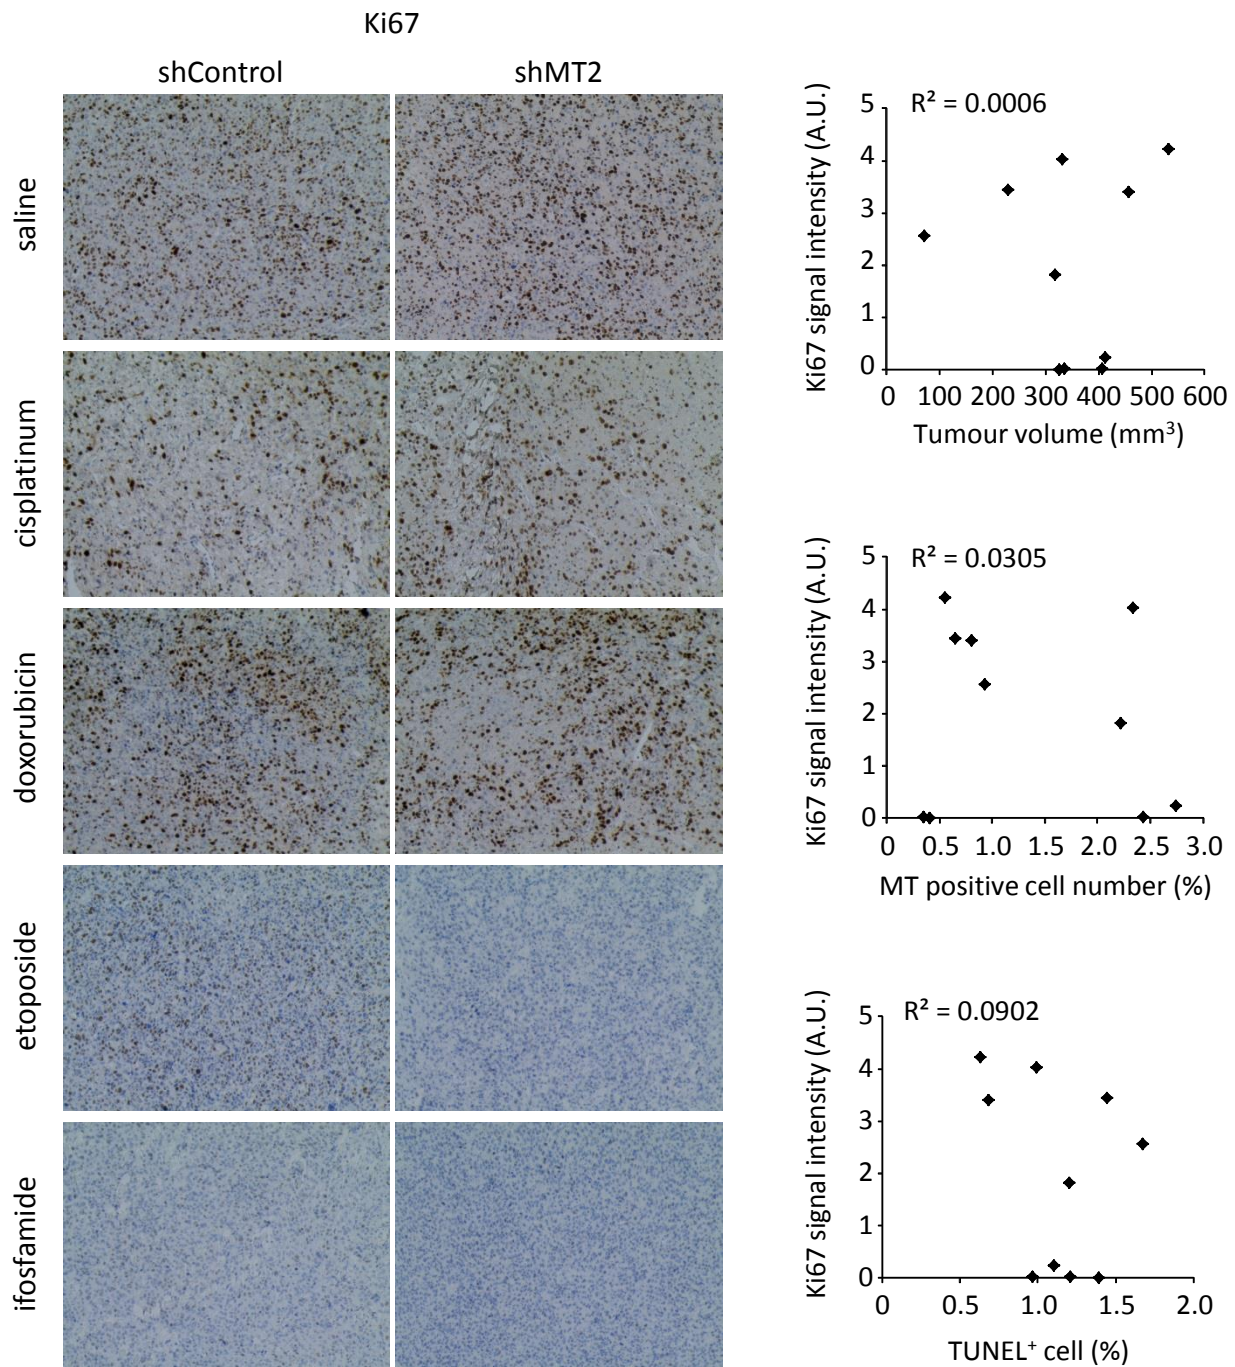

**Supplemental Figure 6.** K7M2 cells modified with shControl or shMT2 were injected IM into the thighs of SCID mice and administered with chemotherapy as described in the materials & methods section. Representative image showing immune-histochemical (IHC) staining for Ki67 in primary tumour FFPE sections.

Spearman correlations between the number of Ki67 positive cells, and tumour volume as expressed as mm<sup>3</sup>. The determination coefficient  $R^2$  are also given.
